1 Diabetes and all-cause mortality among middle-aged and older adults in  
2 China, England, Mexico, rural South Africa, and the United States: A  
3 population-based study of longitudinal aging cohorts

4  
5 Hunter Green<sup>1</sup>, Yuan S. Zhang<sup>2,3</sup>, Chihua Li<sup>4,5</sup>, Paola Zaninotto<sup>6</sup>, Kenneth  
6 M. Langa<sup>5,7</sup>, Jinkook Lee<sup>1,8</sup>, Jennifer Manne-Goehler<sup>†9</sup>, David Flood<sup>†7\*</sup>

- 7
- 8 1. Center for Economic and Social Research, University of Southern California, Los  
9 Angeles, California, USA
  - 10 2. Department of Sociomedical Sciences, Mailman School of Public Health,  
11 Columbia University, New York City, New York, USA
  - 12 3. Robert N. Butler Columbia Aging Center, Mailman School of Public Health,  
13 Columbia University, New York City, New York, USA
  - 14 4. Institute of Chinese Medical Sciences, University of Macau, Macao SAR, China
  - 15 5. Survey Research Center, University of Michigan Institute for Social Research,  
16 Ann Arbor, Michigan, USA
  - 17 6. Department of Epidemiology and Public Health, University College London,  
18 London, UK
  - 19 7. Department of Internal Medicine, University of Michigan, Ann Arbor, Michigan,  
20 USA
  - 21 8. Department of Economics, University of Southern California, Los Angeles,  
22 California, USA
  - 23 9. Division of Infectious Diseases, Massachusetts General Hospital, Boston, USA

24 †Denotes joint senior authors

25

26 \*Corresponding author

27 David Flood, MD, MSc

28 Department of Internal Medicine

29 University of Michigan

30 F4315 University Hospital South, Unit 4

31 Ann Arbor, MI 48109

32 (734) 232-4891

33 [dcflood@umich.edu](mailto:dcflood@umich.edu)

34

35 Manuscript word count: 2,894

36 Abstract word count: 250

37 References: 40

38 Tables and figures: 4

39

40 **Keywords:** global diabetes, diabetes mortality, cross-country comparisons, diabetes

41 epidemiology

42

43 **ARTICLE HIGHLIGHTS**

44 **Why did we undertake this study?**

45 We aimed to address the need for comparable estimates of all-cause mortality among  
46 people with diabetes in diverse global settings.

47

48 **What is the specific question(s) we wanted to answer?**

49 How does diabetes impact all-cause mortality among middle-aged and older adults  
50 (aged 51 years or greater) in China, England, Mexico, rural South Africa, and the United  
51 States?

52

53 **What did we find?**

54 Middle-aged and older adults with diabetes had higher all-cause mortality than people  
55 without diabetes in all countries. Relative mortality differences ranged from mortality  
56 rate ratios of 1.53 in the United States to 2.02 in Mexico. Absolute mortality differences  
57 ranged from mortality rate differences (per 1,000 person-years) of 11.9 in England to  
58 24.6 in South Africa.

59

60 **What are the implications of our findings?**

61 There is an urgent need to implement clinical and public health interventions to improve  
62 diabetes outcomes globally.

63 **ABSTRACT**

64 **Objective:** There is a need for comparable worldwide data on the impact of diabetes on  
65 mortality. This study assessed diabetes and all-cause mortality among middle-aged and  
66 older adults in five countries.

67  
68 **Research Design and Methods:** We analyzed adults aged 51 years or older followed  
69 between 2010 and 2020 from population-based cohorts in China, England, Mexico, rural  
70 South Africa, and the United States. Diabetes was defined by self-report or an elevated  
71 diabetes blood-based biomarker meeting the clinical criteria for diabetes. All-cause  
72 mortality was assessed through linkages or informant interviews. We used Poisson  
73 regression models to estimate mortality rate ratios and mortality rate differences,  
74 comparing people with diabetes to those without diabetes. Models were adjusted for  
75 age, gender, education, smoking status, body mass index, and economic status.

76  
77 **Results:** We included 29,397 individuals, of whom 4,916 (16.7%) died during the study  
78 period. The median follow-up time ranged from 4.6 years in South Africa to 8.3 years in  
79 China. The adjusted all-cause mortality rate ratios for people with diabetes versus those  
80 without diabetes ranged from 1.53 (95% CI: 1.39-1.68) in the United States to 2.02  
81 (95% CI: 1.34-3.06) in Mexico. The adjusted mortality rate differences (per 1,000  
82 person-years) for people with diabetes versus those without diabetes ranged from 11.9  
83 (95% CI: 4.8-18.9) in England to 24.6 (95% CI: 12.2-37.0) in South Africa.

84

85    **Conclusions:** Diabetes was associated with increased all-cause mortality in population-  
86    based cohorts across five diverse countries. There is an urgent need to implement  
87    clinical and public health interventions to improve diabetes outcomes globally.

## 88 INTRODUCTION

89 More than half a billion people worldwide are living with diabetes.<sup>1,2</sup> By 2050, this  
90 number will increase to 1.2 billion people.<sup>1</sup> Given the epidemiology of diabetes, it is  
91 crucial to understand how it impacts long-term health outcomes such as mortality in  
92 diverse populations worldwide. All-cause mortality among people with diabetes at the  
93 population level is a key metric in the World Health Organization (WHO) global diabetes  
94 monitoring framework.<sup>3</sup> The WHO recommends monitoring diabetes mortality because it  
95 is inherently significant to patients and policymakers, modifiable through evidence-  
96 based interventions, and amenable to standardized assessment methods.<sup>3</sup>

97  
98 While diabetes has long been associated with increased mortality in high-income  
99 countries,<sup>4-6</sup> contemporary and cross-national estimates of this association have been  
100 limited by several factors. First, there is a paucity of data on diabetes and mortality from  
101 low- and middle-income countries where most people with diabetes live, and this is  
102 especially true for middle-aged or older adults who are often understudied in these  
103 settings.<sup>7</sup> Second, temporal declines in all-cause mortality in high-income countries  
104 have been observed in recent decades, so updated data are needed.<sup>8</sup> Third, population  
105 data on diabetes and mortality are often not comparable across settings due to  
106 differences in sample selection, case definitions, and mortality ascertainment.<sup>7</sup> These  
107 limitations pose challenges for accurately assessing the global burden of diabetes and  
108 monitoring diabetes policy responses.

109

110 To address these gaps, this study aimed to evaluate the association between diabetes  
111 and all-cause mortality among middle-aged and older adults with diabetes using recent  
112 data from comparable population-based aging cohorts in five diverse countries.

113

## 114 **RESEARCH DESIGN AND METHODS**

### 115 **Study design and sample**

116 We conducted a longitudinal analysis of population-based aging cohorts in five  
117 countries: China (China Health and Retirement Longitudinal Study [CHARLS]),<sup>9</sup>  
118 England (English Longitudinal Study of Ageing [ELSA]),<sup>10</sup> Mexico (Mexican Health and  
119 Aging Study [MHAS]),<sup>11</sup> rural South Africa (Health and Aging in Africa: A Longitudinal  
120 Study of an INDEPTH Community in South Africa [HAALSI]),<sup>12</sup> and the United States  
121 (Health and Retirement Study [HRS]).<sup>13</sup> These cohorts are part of the HRS International  
122 Family of Studies, a network of longitudinal aging studies with similar sampling designs,  
123 eligibility, and assessment methods.<sup>14</sup> The cohort inclusion criteria for this analysis were  
124 (1) availability of baseline and follow-up data from 2010 to 2020 and (2) collection of a  
125 blood-based diabetes biomarker at the baseline wave during this period. We chose  
126 2010 to 2020 as our period of interest to maximize comparability between cohorts. With  
127 one exception, the included cohorts were nationally representative of each country's  
128 middle-aged and older population. The exception was the South Africa cohort, which  
129 was representative of rural communities in sub-Saharan Africa. See Appendix 1 for  
130 details on the years of data collection and censoring by cohort.

131

132 Due to minor differences in the lower end of age eligibility between cohorts, we  
133 excluded individuals younger than 51 at baseline to ensure comparability. We also  
134 excluded respondents without follow-up information, with no available blood-based  
135 diabetes biomarker, or with missing data on prior diabetes diagnosis, gender, education,  
136 economic status, smoking status, BMI, or survey weights. In the South Africa cohort, we  
137 excluded individuals with missing human immunodeficiency virus (HIV) status. Appendix  
138 2 shows participant flow diagrams for each cohort including numbers lost to follow-up.

139

#### 140 **Definition of diabetes**

141 We defined diabetes as either (1) a history of self-reported diagnosis by a physician or  
142 health care worker or (2) an elevated blood-based biomarker meeting clinical criteria for  
143 diabetes.<sup>15,16</sup> We used HbA1c  $\geq 6.5\%$  (48 mmol/mol) as the biomarker threshold in all  
144 countries except China and South Africa where we used fasting blood glucose  $\geq 126$   
145 mg/dL (7.0 mmol/L) or random blood glucose  $\geq 200$  mg/dL (11.1 mmol/L). In China,  
146 plasma glucose was assessed using an enzymatic colorimetric test (92% of individuals  
147 were fasting). In the South African cohort, capillary glucose was assessed using a point-  
148 of-care analyzer (24% of individuals were fasting). In England, HbA1c was assessed  
149 using venous blood samples. In Mexico, HbA1c was assessed using a point-of-care  
150 analyzer certified by the National Glycohemoglobin Standardization Program.<sup>17</sup> In the  
151 United States, HbA1c was assessed using dried blood spots converted to whole blood  
152 equivalent values.<sup>18</sup> Relevant question text and biomarker details are provided in  
153 Appendix 3-4.

154



## 155 **Mortality ascertainment**

156 All-cause mortality was captured in England by linking to the National Health Service  
157 Central Register (latest available data from April 2018). In other cohorts, all-cause  
158 mortality was captured during interviews with respondents' spouses or other informants.  
159 In all cohorts, the month and year of death were available. If the date of death was  
160 unknown, it was estimated as the midpoint between waves in which an individual was  
161 known to be alive and had died. We measured survival time in years from the baseline  
162 interview as defined in this study to death, loss to follow-up, or the end of the follow-up  
163 period (May 2018 in England and December 2019 in the other countries), whichever  
164 came first.

165

## 166 **Statistical analysis**

167 Analyses were conducted within each cohort and accounted for survey weights and  
168 sampling design when available. We first calculated the overall and age-stratified  
169 diabetes prevalence at baseline. In calculating overall prevalence, we age-standardized  
170 to the WHO standard population. We then used Poisson regression with an offset for  
171 log-transformed person-years and robust standard errors to estimate differences in  
172 mortality rates among people with diabetes versus those without diabetes. Poisson  
173 models give similar results to Cox models when there are shorter follow-up intervals and  
174 have the advantage of directly estimating event rates.<sup>19,20</sup> Both relative (mortality rate  
175 ratios) and absolute (mortality rate and mortality rate differences) measures are  
176 reported. Mortality rates and mortality rate differences are presented as the number of  
177 deaths per 1,000 person-years.

178 We used prior evidence to develop a directed acyclic graph showing our conceptual  
179 model of the relationship between diabetes and mortality (Appendix 5).<sup>21</sup> We adjusted  
180 for baseline covariates, including age (51-59 years, 60-69 years, and  $\geq 70$  years),  
181 gender (women vs. men), education (less than upper secondary, upper secondary and  
182 vocational, and tertiary), smoking status (current vs. not current smoker), BMI  
183 categories (underweight: BMI  $< 18.5$  kg/m<sup>2</sup>; normal weight: 18.5-24.9 kg/m<sup>2</sup>; overweight:  
184 25.0-29.9 kg/m<sup>2</sup>; obese:  $\geq 30.0$  kg/m<sup>2</sup>), and economic status (tertiles). Economic status  
185 was defined as the annual income of the individual and their co-residing spouse or  
186 dependent children in high-income countries (England and the United States) and the  
187 annual household per-capita consumption in upper-middle-income countries (China,  
188 Mexico, and South Africa). Per-capita consumption is the preferred measure of living  
189 standard derived from surveys in developing countries.<sup>22</sup> In the South African cohort, we  
190 also adjusted for HIV status, given the high prevalence (23%) and known mortality  
191 association in this population.<sup>23</sup> Models were run in the overall sample and by gender.  
192 We estimated differences in mortality rates among people with no diabetes, diagnosed  
193 diabetes, and undiagnosed diabetes. Analyses were performed using Stata version  
194 18.0.

195

## 196 **Sensitivity analyses**

197 We conducted three sensitivity analyses. First, we assessed the consistency of our  
198 findings using Cox proportional hazards regression models. Second, we estimated the  
199 association between diabetes and mortality using a slightly more restrictive  
200 epidemiological diabetes definition of either (1) the self-reported use of a glucose-

201 lowering medication or (2) an elevated biomarker meeting clinical criteria for  
202 diabetes.<sup>24,25</sup> Finally, we performed an analysis without the adjustment for BMI  
203 categories given the potentially bidirectional relationship between diabetes and BMI.

204

## 205 **Data availability and ethics**

206 This study was deemed exempt from institutional ethics approval at the University of  
207 Michigan (HUM00256096). Data included in this study are publicly available for all  
208 cohorts except for mortality data for ELSA. Details on accessing data can be found at  
209 the Gateway to Global Aging Data website (<https://g2aging.org/>).

210

## 211 **RESULTS**

### 212 **Survey and respondent characteristics**

213 Table 1 presents survey and respondent characteristics for the five cohorts. The final  
214 sample included 6,251 individuals in China, 4,819 in England, 1,717 in Mexico, 3,411 in  
215 South Africa, and 13,199 in the United States. Of the 29,397 total individuals, 4,916  
216 (16.7%) died during the study period. The median follow-up time ranged from 4.6  
217 (interquartile range [IQR]: 4.4-4.8) years in South Africa to 8.3 (IQR: 8.2-8.4) years in  
218 China. There were 191,782 total person-years of follow-up in the cohorts (China: 48,122  
219 person-years; England: 24,536 person-years; Mexico: 11,192 person-years; South  
220 Africa: 14,722 person-years; and United States: 93,210 person-years).

221

222 There was considerable cross-country variation in some respondent characteristics, as  
223 illustrated in Table 1. For example, while nine-tenths of individuals in China (89.9%

224 [95% CI: 88.2-91.4]), Mexico (88.8% [95% CI: 85.9-91.2]), and South Africa (93.3%  
225 [95% CI: 92.4-94.1]) had less than an upper secondary education, most individuals in  
226 England (69.2% [95% CI: 67.5-70.8]) and the United States (86.1% [95% CI: 84.7-87.4])  
227 had an upper secondary education or greater. Current smoking ranged from 8.4% (95%  
228 CI: 7.5-9.3) in South Africa to 31.0% (95% CI: 28.6-33.6) in China. The prevalence of  
229 individuals who were obese ranged from 4.5% (95% CI: 3.9-5.3) in China to 43.3%  
230 (95% CI: 42.3-44.4) in the United States.

231

### 232 **Diabetes prevalence**

233 The age-standardized prevalence of diabetes was highest in Mexico (37.4% [95% CI:  
234 33.4-41.5], followed by the United States (21.8% [95% CI: 20.8-22.8]), China (15.7%  
235 [95% CI: 14.3-17.2]), South Africa (12.1% [95% CI: 11.1-13.3]), and England (11.7%  
236 [95% CI: 10.6-13.0]). Figure 1 shows the age-specific prevalence of diabetes by cohort  
237 at baseline. Among individuals with diabetes, the age-standardized proportion of those  
238 with diabetes who reported a prior diabetes diagnosis ranged from 46.4% (95% CI:  
239 42.1-50.7) in China to 86.1% (95% CI: 84.1-87.9) in the United States (Table 1).

240

### 241 **Mortality rates**

242 Adjusted all-cause mortality rates (per 1,000 person-years) are presented in Figure 2  
243 and Appendix 6. In each cohort, mortality rates were higher among people with diabetes  
244 than those without diabetes. Across the cohorts, mortality rates among people with  
245 diabetes were highest in South Africa (57.5 [95% CI: 45.5-69.5]), followed by the United

246 States (39.2 [95% CI: 36.1-42.4]), China (95% CI: 35.5 [95% CI: 28.6-42.4]), England  
247 (28.8 [95% CI: 22.1-35.6]), and Mexico (29.0 [95% CI: 19.0-39.0]).

248

### 249 **Mortality rate ratios and mortality rate differences**

250 The adjusted overall all-cause mortality rate ratios for people with diabetes versus those  
251 without diabetes ranged from 1.53 (95% CI: 1.39-1.68) in the United States to 2.02  
252 (95% CI: 1.34-3.06) in Mexico (Figure 3A). The adjusted mortality rate differences (per  
253 1,000 person-years) for people with diabetes versus those without diabetes ranged from  
254 11.9 (95% CI: 4.8-18.9) in England to 24.6 (95% CI: 12.2-37.0) in South Africa. No  
255 significant differences were observed in adjusted mortality rate ratios or adjusted  
256 mortality rate differences by sex in cohorts. Mortality rate ratios appeared to decrease in  
257 older age groups in the cohorts from England and the United States (Appendix 7).

258

259 Figure 3B shows results when the diabetes classification was separated by diagnosed  
260 or undiagnosed status, compared to no diabetes. In general, there appeared to be a  
261 tendency among people diagnosed with diabetes to have higher mortality than people  
262 with undiagnosed diabetes. However, these differences were statistically significant only  
263 in Mexico where people with diagnosed diabetes compared to undiagnosed diabetes  
264 had an adjusted mortality rate ratio of 1.95 (95% CI: 1.11-3.43), corresponding to an  
265 adjusted mortality rate difference of 22.6 (95% CI: -7.3-52.4) deaths per 1,000 person-  
266 years (Appendix 8).

267

268

## 269 **Sensitivity analyses**

270 The results of the first sensitivity analysis using Cox proportional hazards regression  
271 models (Appendix 9) were generally consistent with the main results using Poisson  
272 regression models. In the second sensitivity analysis using the slightly more restrictive  
273 epidemiological diabetes definition of either the use of a glucose-lowering medication (in  
274 place of self-reported diagnosis) or an elevated biomarker, we observed a slightly  
275 higher point estimate for the adjusted mortality rate ratios in the China cohort (1.86 vs.  
276 1.79) and slightly lower adjusted mortality rate ratios in the Mexico cohort (1.84 vs. 2.02;  
277 Appendix 10). The third sensitivity analysis removing adjustment for BMI had the effect  
278 of slightly attenuating the mortality rate ratios and mortality rate differences compared to  
279 the main analysis (Appendix 11).

280

## 281 **CONCLUSIONS**

282 In this study of middle-aged and older adults followed between 2010 and 2020 from  
283 population-based cohorts in five diverse countries (four of which were nationally  
284 representative), we found that people with diabetes consistently had higher all-cause  
285 mortality than people without diabetes. Relative mortality differences were similar  
286 across cohorts, ranging from mortality rate ratios of 1.53 (95% CI: 1.39-1.68) in the  
287 United States to 2.02 (95% CI: 1.34-3.06) in Mexico. Absolute mortality differences had  
288 more variation across cohorts, ranging from mortality rate differences (per 1,000  
289 person-years) of 11.9 (95% CI: 4.8-18.9) in England to 24.6 (95% CI: 12.2-37.0) in  
290 South Africa. These findings using recent and comparable data highlight the immense  
291 burden of diabetes around the world, particularly in low- and middle-income country

292 settings such as rural South Africa and Mexico where the absolute mortality impact of  
293 diabetes appears greatest. These are also settings where diabetes care is thought to be  
294 least robust.<sup>3,26,27</sup>

295  
296 Many prior studies assessing the association between diabetes and all-cause mortality  
297 have been conducted in high-income countries and among younger age groups.<sup>3,7,8</sup>  
298 Large-scale meta-analyses in the last two decades have reported relative mortality  
299 differences among people with diabetes, as compared to those without diabetes, that  
300 are generally similar to findings in our study.<sup>4,6,28,29</sup> However, these meta-analyses  
301 primarily included non-representative cohorts from high-income countries, limiting  
302 population inferences globally. A multi-country analysis from 1995 to 2016 in 16  
303 countries provides updated evidence of a reduction in all-cause mortality among people  
304 with diagnosed diabetes, but data were only available from high-income countries.<sup>8</sup> The  
305 Prospective Urban Rural Epidemiology study reported greater absolute mortality among  
306 people with diabetes in middle-income and low-income countries, as compared to  
307 people with diabetes in high-income countries.<sup>5</sup> While studies on diabetes-related  
308 mortality previously have been performed in each of the countries included in our  
309 analysis,<sup>30-36</sup> our study uniquely compares diabetes-related mortality in multiple  
310 countries using similar methods across the entire continuum of middle-aged and older  
311 adults. Individuals in this age range are sometimes excluded from population-based  
312 studies worldwide. However, they have the highest diabetes prevalence and require  
313 comprehensive clinical management to prevent diabetes complications.

314

315 An important secondary finding in our study was the tendency of higher mortality among  
316 people with diagnosed diabetes compared to undiagnosed diabetes. This finding was  
317 most marked in Mexico and South Africa. Many—though not all—prior high-quality  
318 population-based studies have reported similar findings.<sup>5,30-32,37</sup> We hypothesize that the  
319 greater mortality among people with previously diagnosed compared to undiagnosed  
320 diabetes likely reflects a selection effect related to diabetes severity and/or diabetes  
321 duration. Diabetes patients with the highest disease severity or progression are most  
322 likely to experience symptoms, to seek a diagnosis in the health care system, and,  
323 despite obtaining a diagnosis, to die. This selection effect may be most salient in  
324 countries at lower income levels where the proportion of adults with diabetes who are  
325 diagnosed is as low as 20%, compared to 80% or greater in some high-income  
326 countries such as the United States.<sup>3</sup>

327  
328 What are the policy implications emerging from this work? The higher absolute mortality  
329 rates in South Africa and Mexico suggest that people with diabetes in these countries  
330 experience challenges accessing quality diabetes care. There is an urgent need to  
331 scale up evidence-based interventions to manage diabetes and its associated  
332 cardiovascular risk factors, particularly in low- and middle-income countries where  
333 societies are aging, absolute diabetes mortality is highest, and the population with  
334 diabetes is rapidly growing.<sup>2</sup> Evidence from Sweden shows that people with diabetes  
335 who are appropriately managed and achieve risk factor control have little or no excess  
336 mortality compared to those without diabetes.<sup>38</sup> Yet only 10% of people with diabetes in  
337 low- and middle-income countries receive comprehensive diabetes management



338 aligned with guidelines.<sup>26</sup> In the coming decades, diabetes will cause a staggering  
339 degree of premature mortality unless health systems are strengthened to improve  
340 diabetes care.<sup>1</sup> The WHO Global Diabetes Compact is a crucial international effort to  
341 stimulate improvements in equitable, affordable, and quality care for people with  
342 diabetes.<sup>1,3</sup> A key pillar of these efforts is the inclusion of stakeholders from the public  
343 and private sectors, as well as individuals with lived experiences of diabetes.

344  
345 Our study has several limitations. First, our analysis did not include people aged 50  
346 years or younger. Younger populations with diabetes tend to have high diabetes  
347 mortality compared to young populations without diabetes.<sup>30-32</sup> Our results should not be  
348 generalized to entire populations or young populations. Still, they can be generalized to  
349 populations aged 51 years or older, which represent approximately two-thirds of people  
350 with diabetes worldwide.<sup>2</sup> Second, differences in the blood-based diabetes biomarkers  
351 collected in each cohort (e.g., glucose versus HbA1c) may contribute to slightly different  
352 phenotypes of individuals classified as having undiagnosed diabetes.<sup>39,40</sup> This limitation  
353 could decrease the comparability of estimates across cohorts. Third, our study lacks  
354 data on cause-specific mortality, preventing us from distinguishing between  
355 microvascular and macrovascular patterns of death among individuals with diabetes.  
356 Fourth, the South African cohort was not nationally representative, though it is  
357 representative of a rural community like many others in sub-Saharan Africa. Finally,  
358 while this analysis used data from a geographically and economically diverse set of  
359 countries, the included cohorts may not fully represent populations with diabetes  
360 worldwide. In particular, none of the cohorts were drawn from low- or lower-middle-

361 income countries. Estimating diabetes mortality in these settings is an important area of  
362 future research.

363

364 In summary, we observed that diabetes was consistently associated with increased all-  
365 cause mortality across five diverse settings, and absolute diabetes mortality was  
366 particularly high in low- and middle-income countries where systems of care for  
367 diabetes are known to be weaker. The findings reinforce the need to implement clinical  
368 and public health interventions to improve diabetes outcomes in countries worldwide.

## 369 **ACKNOWLEDGMENTS**

### 370 **Funding and Assistance**

371 The preparation of this paper was supported by the Gateway to Global Aging Data,  
372 which is funded by the U.S. National Institute on Aging (award R01AG030153). The  
373 English Longitudinal Study of Ageing is funded by the National Institute on Aging (award  
374 R01AG017644) and by a consortium of U.K. government departments (Department for  
375 Health and Social Care; Department for Transport; and Department for Work and  
376 Pensions, which is coordinated by the National Institute for Health Research [NIHR,  
377 Ref: 198-1074]). The Health and Retirement Study is funded by the U.S. National  
378 Institute on Aging (award U01AG009740) and the Social Security Administration, and  
379 performed at the Institute for Social Research, University of Michigan. The Health and  
380 Aging in Africa: A Longitudinal Study in South Africa study is funded by the U.S.  
381 National Institute on Aging (award 5P01AG041710). D.F. was supported by the U.S.  
382 National Heart, Lung, and Blood Institute (award K23HL161271), the Michigan Center  
383 for Diabetes Translational Research (award P30DK092926), the University of Michigan  
384 Claude D. Pepper Older Americans Independence Center (award 5P30AG024824), and  
385 the University of Michigan Caswell Diabetes Institute Clinical Translational Research  
386 Scholars Program. Y.S.Z was supported by the U.S. National Institute on Aging (award  
387 R00AG070274). JM-G is supported by the National Institute of Diabetes and Digestive  
388 and Kidney Diseases, National Institutes of Health (award number K23DK12516). The  
389 contents of this research are solely the responsibility of the authors and do not  
390 necessarily represent the official views of the National Institutes of Health.

391

392 **Conflict of Interest**

393 D.F. and JM.-G. have received consultant fees from the World Health Organization for  
394 activities relating to global diabetes monitoring.

395

396 **Author Contributions and Guarantor Statement**

397 H.G., J.M.-G., and D.F. conceived the idea for this study. H.G. conducted the statistical  
398 analysis. H.G. and D.F. wrote the first draft of the manuscript with substantial revisions  
399 from J.M.-G. H.G. and P.Z. verified the underlying data. Y.S.Z. and P.Z. provided  
400 analytic support. All authors provided crucial input on multiple iterations of the  
401 manuscript. D.F. had full access to the data except the ELSA mortality data; due to  
402 privacy regulations, these data were restricted in access to P.Z. D.F. is the guarantor of  
403 this work and, as such, takes responsibility for the integrity of the data and the accuracy  
404 of the data analysis.

405 **REFERENCES**

- 406 1. Ong KL, Stafford LK, McLaughlin SA, et al. Global, regional, and national burden  
407 of diabetes from 1990 to 2021, with projections of prevalence to 2050: a systematic  
408 analysis for the Global Burden of Disease Study 2021. *The Lancet* 2023.
- 409 2. International Diabetes Federation. IDF Diabetes Atlas, 10th edition: International  
410 Diabetes Federation, 2021.
- 411 3. Gregg EW, Buckley J, Ali MK, et al. Improving health outcomes of people with  
412 diabetes: target setting for the WHO Global Diabetes Compact. *Lancet* 2023;  
413 401(10384): 1302-12.
- 414 4. Woodward M, Zhang X, Barzi F, et al. The effects of diabetes on the risks of  
415 major cardiovascular diseases and death in the Asia-Pacific region. *Diabetes Care*  
416 2003; 26(2): 360-6.
- 417 5. Anjana RM, Mohan V, Rangarajan S, et al. Contrasting Associations Between  
418 Diabetes and Cardiovascular Mortality Rates in Low-, Middle-, and High-Income  
419 Countries: Cohort Study Data From 143,567 Individuals in 21 Countries in the PURE  
420 Study. *Diabetes Care* 2020; 43(12): 3094-101.
- 421 6. Rao Kondapally Seshasai S, Kaptoge S, Thompson A, et al. Diabetes mellitus,  
422 fasting glucose, and risk of cause-specific death. *N Engl J Med* 2011; 364(9): 829-41.
- 423 7. Ali MK, Pearson-Stuttard J, Selvin E, Gregg EW. Interpreting global trends in  
424 type 2 diabetes complications and mortality. *Diabetologia* 2021.

- 425 8. Magliano DJ, Chen L, Carstensen B, et al. Trends in all-cause mortality among  
426 people with diagnosed diabetes in high-income settings: a multicountry analysis of  
427 aggregate data. *The Lancet Diabetes & Endocrinology* 2022; 10(2): 112-9.
- 428 9. Zhao Y, Hu Y, Smith JP, Strauss J, Yang G. Cohort profile: the China Health and  
429 Retirement Longitudinal Study (CHARLS). *Int J Epidemiol* 2014; 43(1): 61-8.
- 430 10. Zaninotto P, Steptoe A. English Longitudinal Study of Ageing. *Encyclopedia of*  
431 *Gerontology and Population Aging*, 2019: 1-7.
- 432 11. Wong R, Michaels-Obregon A, Palloni A. Cohort Profile: The Mexican Health and  
433 Aging Study (MHAS). *Int J Epidemiol* 2017; 46(2): e2.
- 434 12. Gomez-Olive FX, Montana L, Wagner RG, et al. Cohort Profile: Health and  
435 Ageing in Africa: A Longitudinal Study of an INDEPTH Community in South Africa  
436 (HAALSI). *Int J Epidemiol* 2018; 47(3): 689-90j.
- 437 13. Sonnega A, Faul JD, Ofstedal MB, Langa KM, Phillips JW, Weir DR. Cohort  
438 Profile: the Health and Retirement Study (HRS). *Int J Epidemiol* 2014; 43(2): 576-85.
- 439 14. Lee J, Phillips D, Wilkens J, Gateway to Global Aging Data T. Gateway to Global  
440 Aging Data: Resources for Cross-National Comparisons of Family, Social Environment,  
441 and Healthy Aging. *J Gerontol B Psychol Sci Soc Sci* 2021; 76(Suppl 1): S5-S16.
- 442 15. WHO. Definition and diagnosis of diabetes mellitus and intermediate  
443 hyperglycaemia: report of a WHO/IDF consultation. Geneva: World Health Organization,  
444 2006.

- 445 16. WHO. Use of glycated haemoglobin (HbA1c) in the diagnosis of diabetes  
446 mellitus. Geneva: World Health Organization, 2011.
- 447 17. INSP. Mexican Health and Aging Study 2012 (MHAS 2012): Manual of  
448 Procedures Anthropometrics and Biological Sample. Mexico City: Instituto Nacional de  
449 Salud Pública (INSP), 2012.
- 450 18. Crimmins E, Faul J, Kim JK, Weir D. Documentation of Biomarkers in the 2010  
451 and 2012 Health and Retirement Study. Ann Arbor, MI: : Survey Research Center,  
452 University of Michigan, 2015.
- 453 19. Loomis D. Poisson regression analysis of ungrouped data. *Occupational and*  
454 *Environmental Medicine* 2005; 62(5): 325-9.
- 455 20. Vonesh EF, Schaubel DE, Hao W, Collins AJ. Statistical methods for comparing  
456 mortality among ESRD patients: Examples of regional/international variations. *Kidney*  
457 *International* 2000; 57: S19-S27.
- 458 21. Tennant PWG, Murray EJ, Arnold KF, et al. Use of directed acyclic graphs  
459 (DAGs) to identify confounders in applied health research: review and  
460 recommendations. *Int J Epidemiol* 2021; 50(2): 620-32.
- 461 22. Deaton A. The analysis of household surveys: a microeconomic approach to  
462 development policy. Washington, DC: World Bank Publications, 2019.

- 463 23. Payne CF, Houle B, Chinogurei C, et al. Differences in healthy longevity by HIV  
464 status and viral load among older South African adults: an observational cohort  
465 modelling study. *The Lancet HIV* 2022; 9(10): e709-e16.
- 466 24. Seiglie JA, Marcus ME, Ebert C, et al. Diabetes Prevalence and Its Relationship  
467 With Education, Wealth, and BMI in 29 Low- and Middle-Income Countries. *Diabetes*  
468 *Care* 2020; 43(4): 767-75.
- 469 25. Flood D, Geldsetzer P, Agoudavi K, et al. Rural-Urban Differences in Diabetes  
470 Care and Control in 42 Low- and Middle-Income Countries: A Cross-sectional Study of  
471 Nationally Representative Individual-Level Data. *Diabetes Care* 2022; 45(9): 1961-70.
- 472 26. Flood D, Seiglie JA, Dunn M, et al. The state of diabetes treatment coverage in  
473 55 low-income and middle-income countries: a cross-sectional study of nationally  
474 representative, individual-level data in 680 102 adults. *Lancet Healthy Longev* 2021;  
475 2(6): e340-e51.
- 476 27. Manne-Goehler J, Geldsetzer P, Agoudavi K, et al. Health system performance  
477 for people with diabetes in 28 low- and middle-income countries: a cross-sectional study  
478 of nationally representative surveys. *PLoS Med* 2019; 16(3): e1002751.
- 479 28. Gnatiuc L, Herrington WG, Halsey J, et al. Sex-specific relevance of diabetes to  
480 occlusive vascular and other mortality: a collaborative meta-analysis of individual data  
481 from 980 793 adults from 68 prospective studies. *The Lancet Diabetes & Endocrinology*  
482 2018; 6(7): 538-46.



- 483 29. Yang JJ, Yu D, Wen W, et al. Association of Diabetes With All-Cause and  
484 Cause-Specific Mortality in Asia: A Pooled Analysis of More Than 1 Million Participants.  
485 *JAMA Netw Open* 2019; 2(4): e192696.
- 486 30. Alegre-Diaz J, Herrington W, Lopez-Cervantes M, et al. Diabetes and Cause-  
487 Specific Mortality in Mexico City. *N Engl J Med* 2016; 375(20): 1961-71.
- 488 31. Bragg F, Holmes MV, Iona A, et al. Association Between Diabetes and Cause-  
489 Specific Mortality in Rural and Urban Areas of China. *JAMA* 2017; 317(3): 280-9.
- 490 32. Stokes A, Preston SH. Deaths Attributable to Diabetes in the United States:  
491 Comparison of Data Sources and Estimation Approaches. *PLoS One* 2017; 12(1):  
492 e0170219.
- 493 33. Chidumwa G, Mazibuko L, Olivier S, et al. HIV, hypertension and diabetes care  
494 and all-cause mortality in rural South Africa in the HIV antiretroviral therapy era: a  
495 longitudinal cohort study. *BMJ Public Health* 2023; 1(1).
- 496 34. Nagy AC, Zaninotto P, Steptoe A, Shim E-J. CVD incidence and mortality among  
497 people with diabetes and/or hypertension: Results from the English longitudinal study of  
498 ageing. *Plos One* 2024; 19(5).
- 499 35. Zhang YS, Strauss JA, Hu P, Zhao Y, Crimmins EM. Links Between Mortality  
500 and Socioeconomic Characteristics, Disease Burden, and Biological and Physical  
501 Functioning in the Aging Chinese Population. *J Gerontol B Psychol Sci Soc Sci* 2022;  
502 77(2): 365-77.

- 503 36. Lozano-Esparza S, Lopez-Ridaura R, Ortiz-Panozo E, et al. Diabetes is  
504 associated with a higher risk of mortality among women in a middle-income country:  
505 Results form the Mexican Teacher's cohort study. *Diabetes Metab* 2019: 101119.
- 506 37. Bracco PA, Gregg EW, Rolka DB, et al. A nationwide analysis of the excess  
507 death attributable to diabetes in Brazil. *Journal of Global Health* 2020; 10(1).
- 508 38. Rawshani A, Rawshani A, Franzen S, et al. Risk Factors, Mortality, and  
509 Cardiovascular Outcomes in Patients with Type 2 Diabetes. *N Engl J Med* 2018; 379(7):  
510 633-44.
- 511 39. Danaei G, Fahimi S, Lu Y, et al. Effects of diabetes definition on global  
512 surveillance of diabetes prevalence and diagnosis: a pooled analysis of 96 population-  
513 based studies with 331 288 participants. *The Lancet Diabetes & Endocrinology* 2015;  
514 3(8): 624–37.
- 515 40. N. C. D. Risk Factor Collaboration. Global variation in diabetes diagnosis and  
516 prevalence based on fasting glucose and hemoglobin A1c. *Nat Med* 2023.
- 517

518  
519

**Table 1: Survey and respondent characteristics**

|                                                   | <b>China<br/>(CHARLS)</b> | <b>England<br/>(ELSA)</b> | <b>Mexico<br/>(MHAS)</b> | <b>South Africa<br/>(HAALSI)</b> | <b>United States<br/>(HRS)</b> |
|---------------------------------------------------|---------------------------|---------------------------|--------------------------|----------------------------------|--------------------------------|
| <b>Survey characteristics</b>                     |                           |                           |                          |                                  |                                |
| Years of data collection (baseline to endline)    | 2011 to 2019              | 2012 to 2018              | 2012 to 2019             | 2014 to 2019                     | 2010 to 2019                   |
| Sample size, n                                    | 6,251                     | 4,819                     | 1,717                    | 3,411                            | 13,199                         |
| Deaths, n                                         | 968                       | 400                       | 206                      | 510                              | 2,832                          |
| Follow-up time (years), median (IQR)              | 8.3 (8.2-8.4)             | 5.5 (5.2-5.7)             | 7.1 (7.1-7.2)            | 4.6 (4.4-4.8)                    | 7.5 (6.2-9.0)                  |
| <b>Respondent characteristics</b>                 |                           |                           |                          |                                  |                                |
| Age (years), median (IQR)                         | 61 (56-68)                | 64 (57-72)                | 63 (56-70)               | 65 (57-73)                       | 63 (57-72)                     |
| Women, % (95% CI)                                 | 50.2 (47.8-52.6)          | 50.9 (49.4-52.3)          | 55.2 (50.8-59.6)         | 53.7 (52.0-55.4)                 | 54.1 (53.3-54.9)               |
| Education, % (95% CI)                             |                           |                           |                          |                                  |                                |
| Less than upper secondary                         | 89.9 (88.2-91.4)          | 30.8 (29.3-32.5)          | 88.8 (85.9-91.2)         | 93.3 (92.4-94.1)                 | 13.9 (12.7-15.4)               |
| Upper secondary and vocational                    | 8.2 (7.3-9.2)             | 50.7 (49.0-52.4)          | 3.4 (2.1-5.6)            | 4.3 (3.7-5.0)                    | 58.7 (56.9-60.4)               |
| Tertiary                                          | 1.9 (0.9-3.9)             | 18.4 (17.1-19.9)          | 7.7 (5.9-10.1)           | 2.4 (1.9-2.9)                    | 27.4 (25.5-29.4)               |
| Current smoker, % (95% CI)                        | 31.0 (28.6-33.6)          | 13.7 (12.5-15.0)          | 16.9 (12.9-21.8)         | 8.4 (7.5-9.3)                    | 14.9 (13.8-16.0)               |
| BMI, % (95% CI)                                   |                           |                           |                          |                                  |                                |
| <18.5 (Underweight)                               | 7.5 (6.7-8.3)             | 0.9 (0.6-1.3)             | 0.9 (0.4-1.8)            | 5.6 (4.9-6.5)                    | 1.0 (0.8-1.3)                  |
| 18.5-24.9 (Normal)                                | 61.0 (58.6-63.4)          | 26.4 (25.0-28.0)          | 26.0 (21.8-30.7)         | 36.5 (34.9-38.1)                 | 20.8 (20.0-21.7)               |
| 25.0-29.9 (Overweight)                            | 27.0 (24.6-29.5)          | 41.8 (40.2-43.5)          | 38.0 (34.0-42.2)         | 28.3 (26.9-29.9)                 | 34.8 (33.8-35.8)               |
| ≥30 (Obese)                                       | 4.6 (3.9-5.3)             | 30.8 (29.3-32.4)          | 35.1 (31.0-39.5)         | 29.6 (28.0-31.1)                 | 43.3 (42.3-44.4)               |
| Diabetes (diagnosed and undiagnosed), % (95% CI)* | 15.7 (14.3-17.2)          | 11.7 (10.6-13.0)          | 37.4 (33.4-41.5)         | 12.1 (11.1-13.3)                 | 21.8 (20.8-22.8)               |
| Diagnosed among all with diabetes, % (95% CI)*    | 46.4 (42.1-50.7)          | 76.1 (69.3-81.7)          | 53.6 (47.2-59.9)         | 57.8 (52.5-62.9)                 | 86.1 (84.1-87.9)               |

520  
521  
522  
523

\*Values are age-standardized to the WHO standard population among adults aged 50 years and older. CHARLS=China Health and Retirement Longitudinal Study. ELSA=English Longitudinal Study of Ageing. HAALSI=Health and Aging in Africa: A Longitudinal Study of an INDEPTH Community in South Africa. HRS=Health and Retirement Study. IQR=Interquartile range. MHAS=Mexican Health and Aging Study.

524 **Figure 1: Age-specific prevalence of diabetes by cohort**

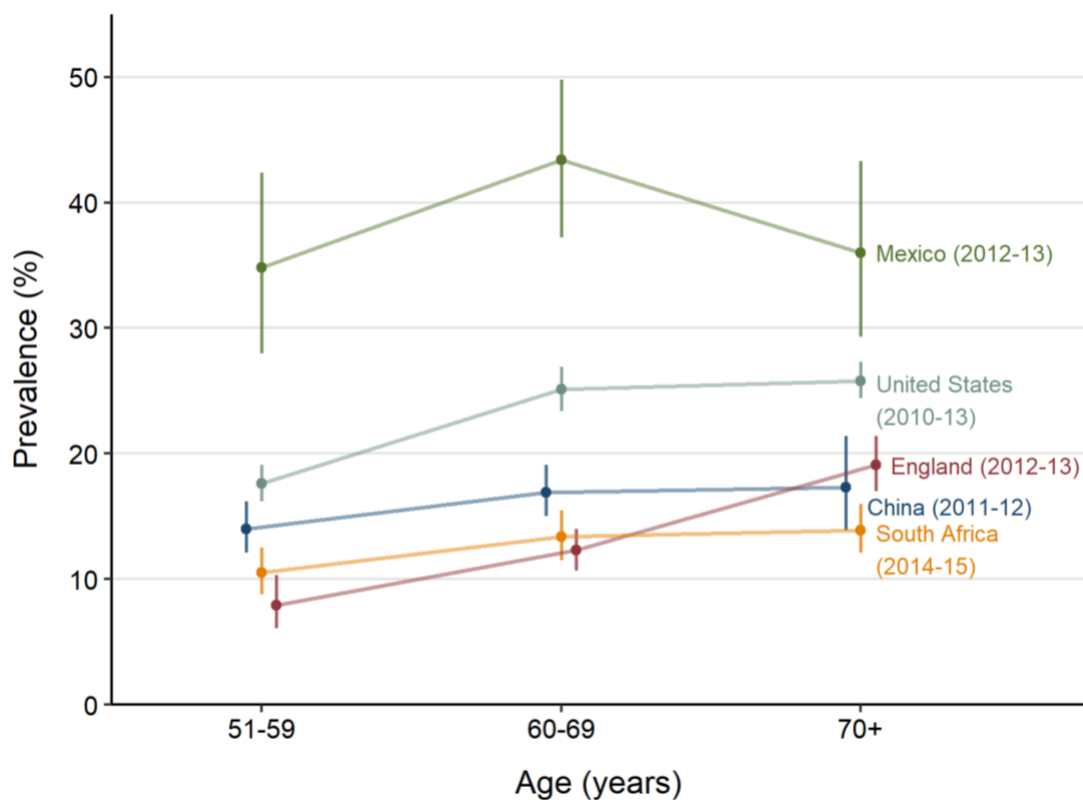

525

526 Diabetes was defined among individuals self-reporting a previous diabetes diagnosis or those with an  
527 elevated biomarker (hemoglobin A1c  $\geq 6.5\%$  [48 mmol/mol], fasting plasma glucose  $\geq 126$  mg/dL [7.0  
528 mmol/L], or random capillary glucose  $\geq 200$  mg/dL [11.1 mmol/L]). The vertical error bars represent 95%  
529 CIs.

530 **Figure 2: Adjusted all-cause mortality rates by cohort**

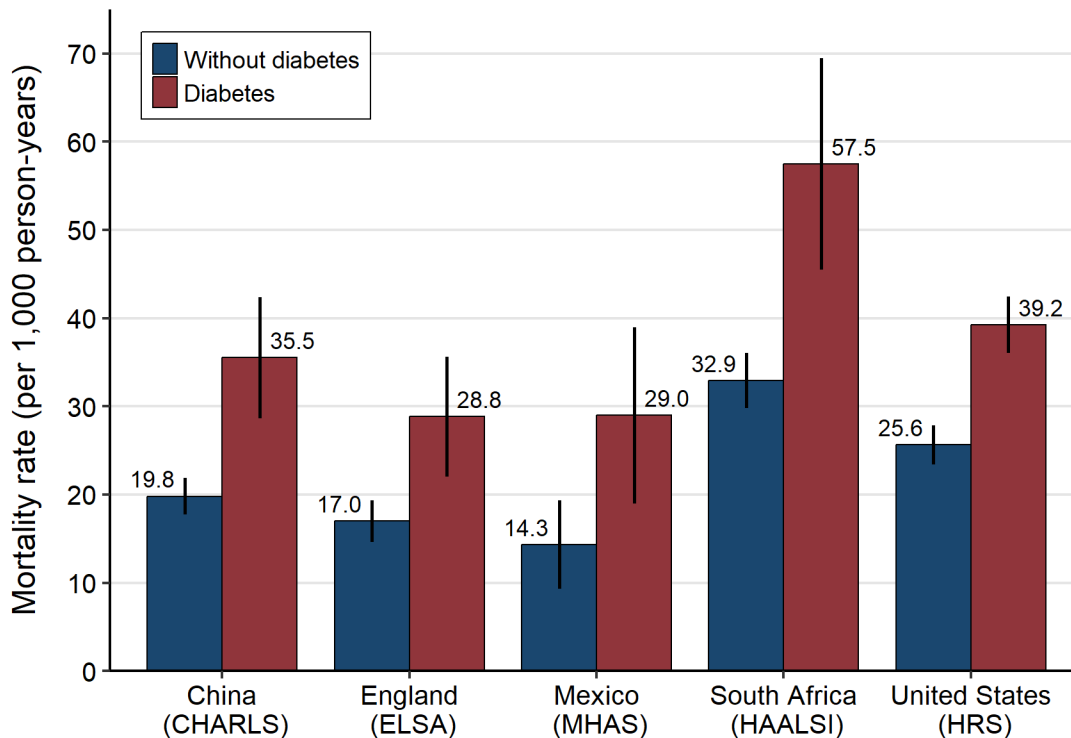

531

532 Mortality rates are presented as the number of deaths per 1,000 person-years. The vertical error bars  
533 represent 95% CIs. Estimates were derived using Poisson regression models with an offset for log-  
534 transformed person-years and robust standard errors and adjusted for age, gender, education, smoking  
535 status, body mass index, and economic status. Models in South Africa also adjusted for HIV status.  
536 CHARLS=China Health and Retirement Longitudinal Study. ELSA=English Longitudinal Study of Ageing.  
537 HAALSI=Health and Aging in Africa: A Longitudinal Study of an INDEPTH Community in South Africa.  
538 HRS=Health and Retirement Study. MHAS=Mexican Health and Aging Study.

539 **Figure 3: Adjusted all-cause mortality rate ratios and mortality rate differences**

540

541 *Panel A: Overall and by gender*

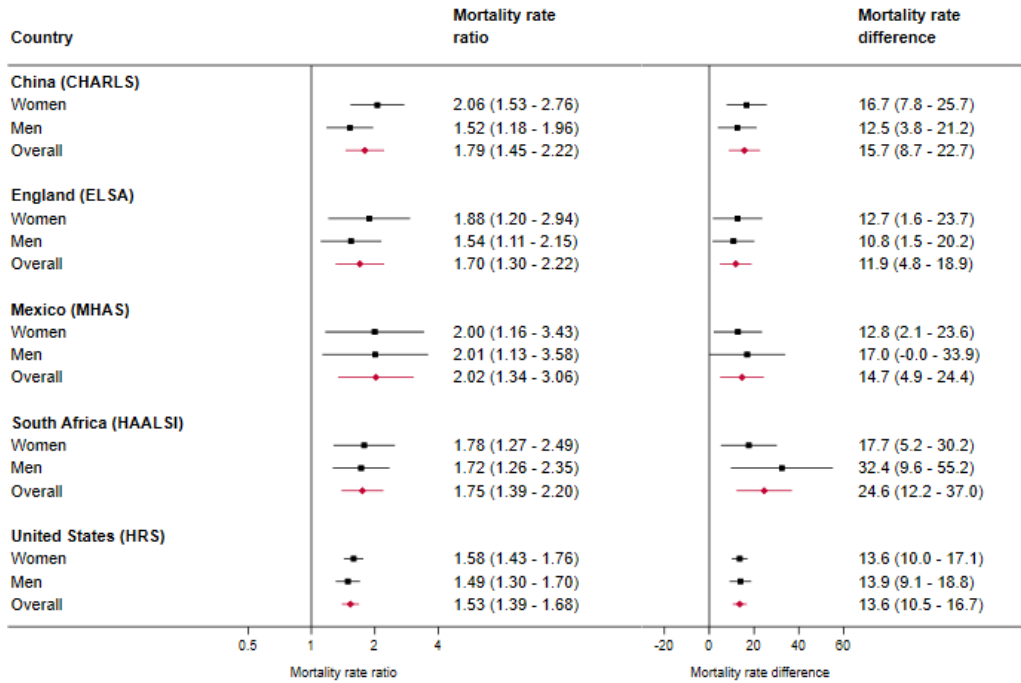

542

543 *Panel B: By diagnosed vs. undiagnosed*

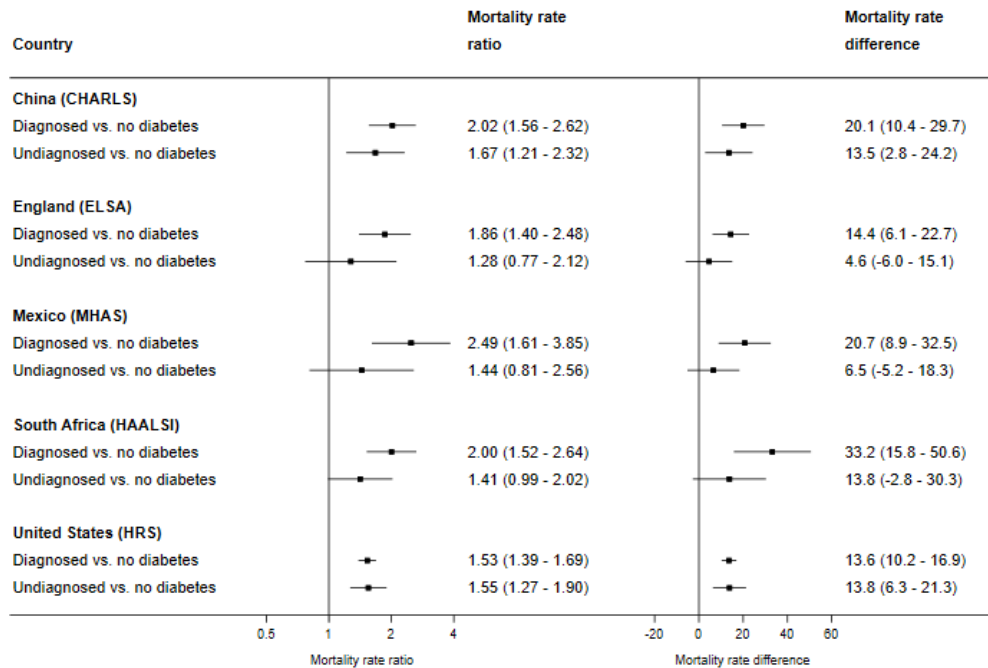

544

545 Mortality rate differences are presented as the number of deaths per 1,000 person-years. The horizontal error  
 546 bars represent 95% CIs. Estimates were derived using Poisson regression models with an offset for log-  
 547 transformed person-years and robust standard errors and adjusted for age, gender, education, smoking status,  
 548 body mass index, and economic status. Models in South Africa also adjusted for HIV status. CHARLS=China  
 549 Health and Retirement Longitudinal Study. ELSA=English Longitudinal Study of Ageing. HAALSI=Health and  
 550 Aging in Africa: A Longitudinal Study of an INDEPTH Community in South Africa. HRS=Health and Retirement  
 551 Study. MHAS=Mexican Health and Aging Study.

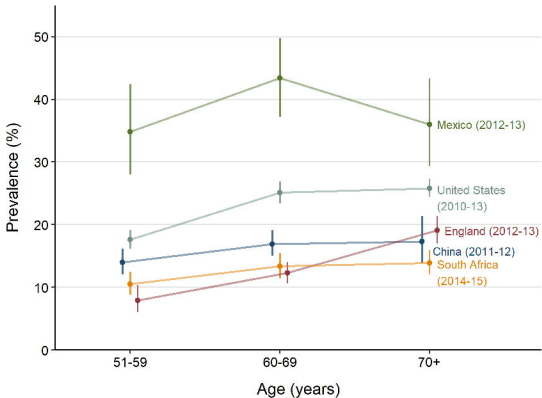

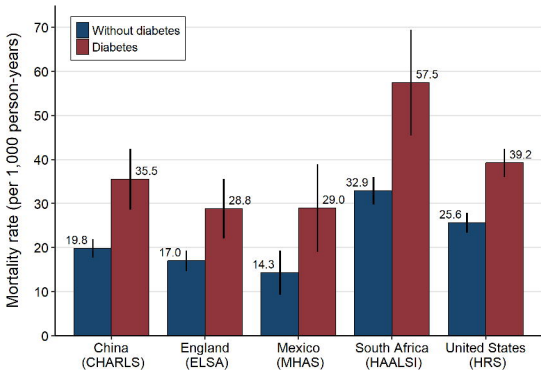



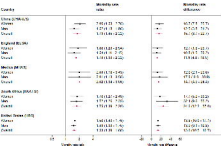

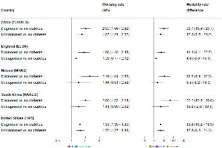

Source: https://medrxiv.org/content/10.1101/2024.10.09.24315174v1.full.pdf
